# Supplementary material for: Developmental Cascades Link Maternal–Newborn Skin-to-Skin Contact with Young Adults’ Psychological Symptoms, Oxytocin, and Immunity; Charting Mechanisms of Developmental Continuity from Birth to Adulthood
Source: MDPI journal article supplement (doi:10.3390/biology12060847), 2023-06-13
Supplement: s1 [file s1]

## Supplementary materials

Developmental Cascades Link Maternal-Newborn Skin-to-Skin Contact with Young Adults' Psychological Symptoms, Oxytocin, and Immunity; Charting Mechanisms of Developmental Continuity from Birth to Adulthood

Supplementary Table S1. Multiple regression predicting child's mental state

|                                         | Estimate | Std.error | t value | P      |
|-----------------------------------------|----------|-----------|---------|--------|
| <b>Group</b>                            | 0.06     | 0.19      | 0.33    | 0.74   |
| <b>birthweight</b>                      | -0.0001  | 0.0003    | -0.47   | 0.64   |
| <b>Mother age</b>                       | 0.04     | 0.02      | 1.84    | 0.072  |
| <b>Mother education (above average)</b> | 0.07     | 0.10      | 0.745   | 0.46   |
| <b>Household income</b>                 | -0.3     | 0.22      | -1.6    | 0.12   |
| <b>Father Education</b>                 | 0.17     | 0.10      | -1.76   | 0.084  |
| <b>Child's age</b>                      | -0.17    | 0.11      | -1.5    | 0.14   |
| <b>Gender</b>                           | 0.077    | 0.188     | 0.41    | 0.6835 |

Supplementary Table S2. Multiple regression predicting child's S-IgA (Z-scores)

|                                         | Estimate      | Std.error     | t value | P           |
|-----------------------------------------|---------------|---------------|---------|-------------|
| <b>Group</b>                            | <b>-0.28</b>  | 0.28          | -1      | 0.32        |
| <b>birthweight</b>                      | <b>0.0001</b> | <b>0.0004</b> | 0.25    | <b>0.80</b> |
| <b>Mother age</b>                       | -0.004        | 0.03          | -0.15   | 0.88        |
| <b>Mother education (above average)</b> | 0.05          | 0.13          | 0.39    | 0.70        |
| <b>Household income</b>                 | <b>-0.13</b>  | 0.33          | -0.4    | 0.70        |
| <b>Father Education</b>                 | -0.06         | 0.14          | -0.41   | 0.68        |
| <b>Child's age</b>                      | <b>0.09</b>   | <b>0.17</b>   | 0.53    | 0.59        |
| <b>Gender</b>                           | <b>-0.23</b>  | <b>0.28</b>   | -0.82   | 0.42        |

Supplementary Table S3. Multiple regression predicting child's OT (Z-scores)

|                         | Estimate        | Std.error      | t value      | P           |
|-------------------------|-----------------|----------------|--------------|-------------|
| <b>Group</b>            | -0.20           | 0.29           | -0.69        | 0.49        |
| <b>birthweight</b>      | <b>-0.00002</b> | <b>0.00047</b> | <b>-0.05</b> | <b>0.96</b> |
| <b>Mother age</b>       | -0.04           | 0.03           | -1.3         | 0.20        |
| <b>Mother education</b> | -0.02           | 0.14           | -0.14        | 0.90        |
| <b>Household income</b> | <b>-0.11</b>    | 0.34           | -0.33        | 0.75        |
| <b>Father Education</b> | -0.01           | 0.15           | -0.05        | 0.96        |
| <b>Child's age</b>      | <b>0.02</b>     | <b>0.17</b>    | 0.097        | 0.92        |
| <b>Gender</b>           | <b>-0.55</b>    | <b>0.29</b>    | -1.92        | 0.06        |

Supplementary Table S4. Comparisons between groups in main study variables, raw data

|                                            | KC             | Control        | t-test                        |
|--------------------------------------------|----------------|----------------|-------------------------------|
| <b>Child depression/anxiety</b>            | -0.04 (0.86)   | -0.01 (0.73)   | $t_{(75)}=-0.155, p=0.87$     |
| <b>Child OT</b>                            | 3.11 (0.20)    | 3.16 (0.25)    | $t_{(78)}=-0.442, p=0.66$     |
| <b>Child s-IgA</b>                         | 6.18 (0.47)    | 6.34 (0.53)    | $t_{(70)}=-1.411, p=0.16$     |
| <b>Child Focused attention</b>             | 4.19 (0.39)    | 3.82 (0.64)    | $t_{(78)}=3.157, p=0.002$     |
| <b>Child EF score</b>                      | 111.51 (10.96) | 101.06 (11.02) | $t_{(72)}=4.085, p=1.129e-4$  |
| <b>Mother depression/anxiety</b>           | -0.27 (0.51)   | 0.30 (1.08)    | $t_{(78)}=-1.43, p=0.157$     |
| <b>Mother depression/anxiety (infancy)</b> | -0.19 (0.71)   | 0.08 (0.71)    | $t_{(78)}=-3.580, p=5.951e-4$ |
| <b>Dyadic synchrony infancy</b>            | 2.66 (0.87)    | 2.23 (0.96)    | $t_{(77)}=2.077, p=0.041$     |
| <b>Dyadic synchrony childhood</b>          | 3.49 (0.70)    | 3.13 (0.80)    | $t_{(76)}=2.084, p=0.040$     |
| <b>Dyadic synchrony adulthood</b>          | 3.95 (0.74)    | 3.53 (0.77)    | $t_{(76)}=2.389, p=0.017$     |
